# Supplementary material for: Acute Cytauxzoon felis Cases in Domestic Cats from Eastern Kansas, a Retrospective Case-Control Study (2006–2019)
Source: MDPI journal article supplement (doi:10.3390/vetsci7040205), 2020-12-18
Supplement: s1 [file s1]

Table S1: Acute cytauxzoonosis case incidence by year and year block.

| Year block       | Year         | # of Incidence per year |
|------------------|--------------|-------------------------|
| <b>2005-2009</b> | 2006         | 16                      |
|                  | 2007         | 10                      |
|                  | 2008         | 9                       |
|                  | 2009         | 18                      |
|                  | <b>Total</b> | <b>53</b>               |
| <b>2010-2014</b> | 2010         | 13                      |
|                  | 2011         | 12                      |
|                  | 2012         | 18                      |
|                  | 2013         | 11                      |
|                  | 2014         | 4                       |
|                  | <b>Total</b> | <b>58</b>               |
| <b>2015-2019</b> | 2015         | 2                       |
|                  | 2016         | 10                      |
|                  | 2017         | 16                      |
|                  | 2018         | 16                      |
|                  | 2019         | 15                      |
|                  | <b>Total</b> | <b>59</b>               |

Table S2: Acute cytauxzoonosis case incidence by year block.

| <b>Year Block</b> | <b>Total incidence #</b> | <b>Average incidence #<br/>per year</b> |
|-------------------|--------------------------|-----------------------------------------|
| <b>2005~2009</b>  | 53                       | 13.3                                    |
| <b>2010~2014</b>  | 58                       | 11.6                                    |
| <b>2015~2019</b>  | 59                       | 11.8                                    |

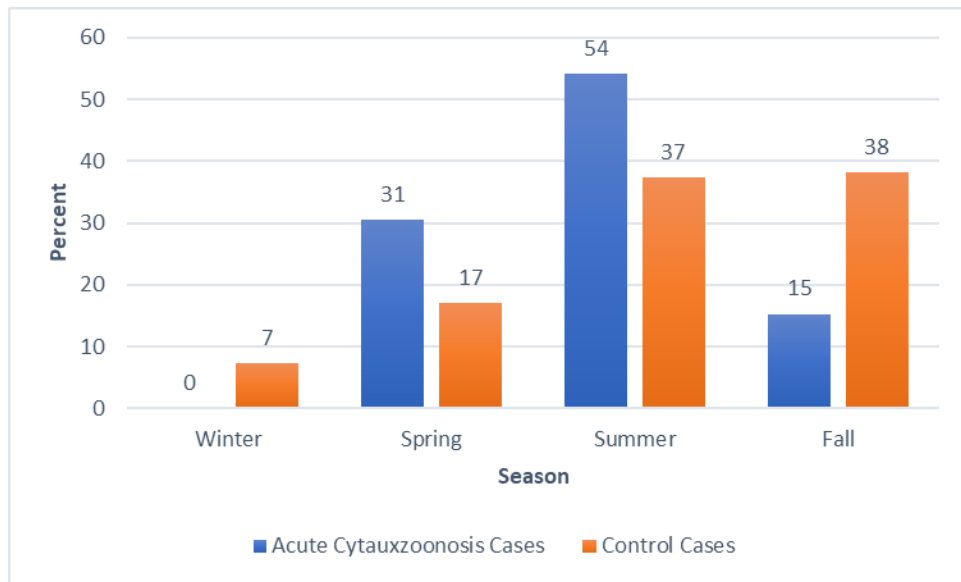

Figure S1: Acute cytauxzoonosis and control case percentages by season. The number above the bar represents the percent of cases by season.

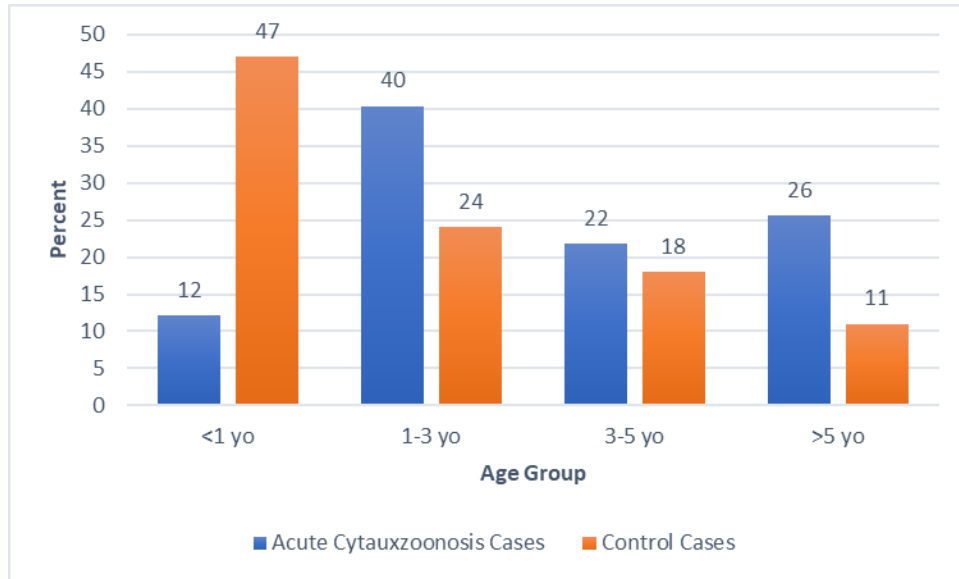

Figure S2: Acute cytauxzoonosis and control case percentage by age group (yo = years old). The number above the bar represents the percent of cases within a given age group.
